# Supplementary material for: Structure and Thermal Stability of Two Estetrol Solvates
Source: MDPI journal article supplement (doi:10.3390/cryst13081211), 2023-08-05
Supplement: s1 [file s1]

**Supplementary materials**
**Table S1.** Intermolecular and intramolecular hydrogen bonds for **Estetrol.H<sub>2</sub>O** [Å and °].

| D-H...A                 | d(D-H) | d(H...A) | d(D...A)  | <(DHA) |
|-------------------------|--------|----------|-----------|--------|
| O(1A)-H(1AA)...O(8S)#1  | 0.84   | 2.03     | 2.783(7)  | 149    |
| O(2A)-H(2AA)...O(3A)    | 0.84   | 2.16     | 2.659(7)  | 117.6  |
| O(2A)-H(2AA)...O(5S)#2  | 0.84   | 2.32     | 2.958(8)  | 133.4  |
| O(3A)-H(3AA)...O(1C)    | 0.84   | 2.29     | 2.750(7)  | 114.5  |
| O(4A)-H(4AA)...O(12S)   | 0.85   | 2.15     | 2.772(7)  | 129.8  |
| O(1B)-H(1B)...O(11S)    | 0.84   | 1.96     | 2.721(7)  | 149.5  |
| O(2B)-H(2BB)...O(1A)    | 0.84   | 2.08     | 2.884(7)  | 161.3  |
| O(3B)-H(3BB)...O(1D)#3  | 0.84   | 2.14     | 2.949(7)  | 161.3  |
| O(4B)-H(4BB)...O(7S)#3  | 0.84   | 2.02     | 2.838(6)  | 166.1  |
| O(1C)-H(1CC)...O(6S)#2  | 0.84   | 1.9      | 2.670(9)  | 151.5  |
| O(2C)-H(2CC)...O(1D)#2  | 0.84   | 2.13     | 2.910(7)  | 153.8  |
| O(3C)-H(3CC)...O(1A)#4  | 0.84   | 2.12     | 2.923(7)  | 160.9  |
| O(1D)-H(1DD)...O(9S)    | 0.84   | 2.03     | 2.821(7)  | 156.5  |
| O(2D)-H(2DD)...O(12S)   | 0.85   | 2.43     | 3.032(5)  | 128    |
| O(3D)-H(3DD)...O(1B)    | 0.84   | 2.12     | 2.757(7)  | 132.8  |
| O(4D)-H(4DD)...O(5S)    | 0.84   | 2.32     | 2.825(8)  | 119.5  |
| O(1E)-H(1EE)...O(2S)    | 0.84   | 1.96     | 2.693(7)  | 144.6  |
| O(3E)-H(3EE)...O(2E)    | 0.84   | 2.16     | 2.631(6)  | 115.6  |
| O(4E)-H(4EE)...O(6S)#2  | 0.84   | 2.53     | 3.314(8)  | 155.3  |
| O(1F)-H(1FF)...O(5S)    | 0.84   | 1.97     | 2.781(10) | 161.6  |
| O(2F)-H(2FF)...O(4B)    | 0.84   | 2.6      | 3.292(6)  | 140.3  |
| O(2F)-H(2FF)...O(3F)    | 0.84   | 2.21     | 2.650(7)  | 112.6  |
| O(3F)-H(3FF)...O(1G)#3  | 0.84   | 2.13     | 2.733(7)  | 128.4  |
| O(4F)-H(4FF)...O(4M)#3  | 0.84   | 2.03     | 2.776(6)  | 148.2  |
| O(1G)-H(1GG)...O(7S)    | 0.84   | 2        | 2.643(7)  | 133.1  |
| O(2G)-H(2GG)...O(3G)    | 0.84   | 2.29     | 2.724(7)  | 112.6  |
| O(3G)-H(3GG)...O(1F)    | 0.85   | 2.22     | 2.756(6)  | 121.6  |
| O(4G)-H(4GG)...O(4I)    | 0.84   | 1.97     | 2.726(9)  | 149.8  |
| O(1H)-H(1HH)...O(3E)    | 0.85   | 2.12     | 2.827(6)  | 139.9  |
| O(2H)-H(2HH)...O(3H)    | 0.84   | 2.18     | 2.640(6)  | 114    |
| O(2H)-H(2HH)...O(1S)#8  | 0.84   | 2.35     | 3.047(6)  | 140.6  |
| O(3H)-H(3HH)...O(1E)#4  | 0.84   | 2.11     | 2.750(7)  | 133    |
| O(4H)-H(4HH)...O(4B)#4  | 0.83   | 1.97     | 2.723(5)  | 149.4  |
| O(1I)-H(1II)...O(12S)#9 | 0.84   | 1.87     | 2.695(7)  | 165.4  |
| O(2I)-H(2II)...O(3I)    | 0.84   | 2.13     | 2.636(7)  | 118.1  |
| O(3I)-H(3II)...O(1M)    | 0.84   | 2.08     | 2.717(7)  | 131.7  |

|                         |      |      |           |       |
|-------------------------|------|------|-----------|-------|
| O(4I)-H(4II)...O(4S)    | 0.84 | 2.18 | 2.917(12) | 146.5 |
| O(1L)-H(1LL)...O(3N)    | 0.84 | 2.01 | 2.774(6)  | 150.5 |
| O(2L)-H(2LL)...O(3L)    | 0.84 | 2.12 | 2.655(7)  | 121.5 |
| O(3L)-H(3LL)...O(1N)#3  | 0.84 | 1.89 | 2.728(6)  | 172.9 |
| O(4L)-H(4LL)...O(4A)#10 | 0.85 | 1.94 | 2.743(5)  | 156.4 |
| O(1M)-H(1MM)...O(10S)#9 | 0.84 | 1.84 | 2.623(7)  | 153.7 |
| O(2M)-H(2MM)...O(3M)    | 0.84 | 2.13 | 2.647(7)  | 119.2 |
| O(3M)-H(3MM)...O(2S)#4  | 0.84 | 1.99 | 2.827(7)  | 172.3 |
| O(4M)-H(4MM)...O(2H)    | 0.84 | 2.23 | 2.854(6)  | 131.7 |
| O(1N)-H(1NN)...O(1S)#4  | 0.84 | 1.85 | 2.675(7)  | 168   |
| O(2N)-H(2NN)...O(4G)    | 0.85 | 2.65 | 3.279(7)  | 131.4 |
| O(4N)-H(4NN)...O(9S)#9  | 0.84 | 2.15 | 2.754(8)  | 129.2 |
| O(1A)-H(1AA)...O(8S)#1  | 0.84 | 2.03 | 2.782(7)  | 149   |
| O(2A)-H(2AA)...O(3A)    | 0.84 | 2.16 | 2.659(7)  | 117.6 |
| O(2A)-H(2AA)...O(5S)#2  | 0.84 | 2.32 | 2.958(8)  | 133.4 |
| O(3A)-H(3AA)...O(1C)    | 0.84 | 2.29 | 2.750(7)  | 114.5 |
| O(4A)-H(4AA)...O(12S)   | 0.85 | 2.15 | 2.772(7)  | 129.8 |
| O(1B)-H(1B)...O(11S)    | 0.84 | 1.96 | 2.721(7)  | 149.5 |
| O(2B)-H(2BB)...O(1A)    | 0.84 | 2.08 | 2.884(7)  | 161.3 |
| O(3B)-H(3BB)...O(1D)#3  | 0.84 | 2.14 | 2.949(7)  | 161.3 |
| O(4B)-H(4BB)...O(7S)#3  | 0.84 | 2.02 | 2.838(6)  | 166.1 |
| O(1C)-H(1CC)...O(6S)#2  | 0.84 | 1.9  | 2.670(9)  | 151.5 |
| O(2C)-H(2CC)...O(1D)#2  | 0.84 | 2.13 | 2.910(7)  | 153.8 |
| O(3C)-H(3CC)...O(1A)#4  | 0.84 | 2.12 | 2.923(7)  | 160.9 |
| O(1D)-H(1DD)...O(9S)    | 0.84 | 2.03 | 2.821(7)  | 156.5 |
| O(2D)-H(2DD)...O(12S)   | 0.85 | 2.43 | 3.032(5)  | 128   |
| O(3D)-H(3DD)...O(1B)    | 0.84 | 2.12 | 2.757(7)  | 132.8 |
| O(4D)-H(4DD)...O(5S)    | 0.84 | 2.32 | 2.825(8)  | 119.5 |
| O(1E)-H(1EE)...O(2S)    | 0.84 | 1.96 | 2.693(7)  | 144.6 |
| O(2E)-H(2EE)...O(3S)#2  | 0.84 | 2.05 | 2.706(6)  | 134.9 |
| O(3E)-H(3EE)...O(2E)    | 0.84 | 2.16 | 2.631(6)  | 115.6 |
| O(4E)-H(4EE)...O(6S)#2  | 0.84 | 2.53 | 3.314(8)  | 155.3 |
| O(1F)-H(1FF)...O(5S)    | 0.84 | 1.97 | 2.781(10) | 161.6 |
| O(2F)-H(2FF)...O(4B)    | 0.84 | 2.6  | 3.292(6)  | 140.3 |
| O(2F)-H(2FF)...O(3F)    | 0.84 | 2.21 | 2.650(7)  | 112.6 |
| O(3F)-H(3FF)...O(1G)#3  | 0.84 | 2.13 | 2.733(7)  | 128.4 |
| O(4F)-H(4FF)...O(4M)#3  | 0.84 | 2.03 | 2.776(6)  | 148.2 |
| O(1G)-H(1GG)...O(7S)    | 0.84 | 2    | 2.643(7)  | 133.1 |
| O(3G)-H(3GG)...O(1F)    | 0.85 | 2.22 | 2.756(6)  | 121.6 |
| O(4G)-H(4GG)...O(4I)    | 0.84 | 1.97 | 2.726(9)  | 149.8 |
| O(1H)-H(1HH)...O(3E)    | 0.85 | 2.12 | 2.827(6)  | 139.9 |

|                         |      |      |           |       |
|-------------------------|------|------|-----------|-------|
| O(2H)-H(2HH)...O(3H)    | 0.84 | 2.18 | 2.640(6)  | 114   |
| O(2H)-H(2HH)...O(1S)#8  | 0.84 | 2.35 | 3.047(6)  | 140.6 |
| O(3H)-H(3HH)...O(1E)#4  | 0.84 | 2.11 | 2.750(7)  | 133   |
| O(4H)-H(4HH)...O(4B)#4  | 0.83 | 1.97 | 2.723(5)  | 149.4 |
| O(1I)-H(1II)...O(12S)#9 | 0.84 | 1.87 | 2.695(7)  | 165.4 |
| O(2I)-H(2II)...O(3I)    | 0.84 | 2.13 | 2.636(7)  | 118.1 |
| O(3I)-H(3II)...O(1M)    | 0.84 | 2.08 | 2.717(7)  | 131.7 |
| O(4I)-H(4II)...O(4S)    | 0.84 | 2.18 | 2.917(12) | 146.5 |
| O(1L)-H(1LL)...O(3N)    | 0.84 | 2.01 | 2.774(6)  | 150.5 |
| O(2L)-H(2LL)...O(3L)    | 0.84 | 2.12 | 2.655(7)  | 121.5 |
| O(3L)-H(3LL)...O(1N)#3  | 0.84 | 1.89 | 2.728(6)  | 172.9 |
| O(4L)-H(4LL)...O(4A)#10 | 0.85 | 1.94 | 2.743(5)  | 156.4 |
| O(1M)-H(1MM)...O(10S)#9 | 0.84 | 1.84 | 2.623(7)  | 153.7 |
| O(2M)-H(2MM)...O(3M)    | 0.84 | 2.13 | 2.647(7)  | 119.2 |
| O(3M)-H(3MM)...O(2S)#4  | 0.84 | 1.99 | 2.827(7)  | 172.3 |
| O(4M)-H(4MM)...O(2H)    | 0.84 | 2.23 | 2.854(6)  | 131.7 |
| O(1N)-H(1NN)...O(1S)#4  | 0.84 | 1.85 | 2.675(7)  | 168   |
| O(2N)-H(2NN)...O(4G)    | 0.85 | 2.65 | 3.279(7)  | 131.4 |
| O(4N)-H(4NN)...O(9S)#9  | 0.84 | 2.15 | 2.754(8)  | 129.2 |

Symmetry transformations used to generate equivalent atoms: #1

#1  $x+1, y, z-1$     #2  $x+1, y, z$     #3  $x, y, z-1$     #4  $x, y, z+1$

#5  $x+1, y+1, z$     #6  $x-1, y, z$     #7  $x-1, y, z-1$     #8  $x+1, y, z+1$

#9  $x, y-1, z$     #10  $x-1, y-1, z$

**Table S2.** Intermolecular hydrogen bonds for **Estetrol.0.5CH<sub>3</sub>OH** [ $\text{\AA}$  and  $^\circ$ ].

| D-H...A                  |      |          |          |        |
|--------------------------|------|----------|----------|--------|
| d(D-H)                   |      | d(H...A) | d(D...A) | <(DHA) |
|                          |      |          |          |        |
| O(4)-H(4O)...O(1)#2      | 0.84 | 1.90     | 2.732(2) | 172.6  |
| O(3)-H(3O)...O(4)#3      | 0.84 | 1.96     | 2.764(2) | 159.6  |
| O(2)-H(2O)...O(4)#4      | 0.84 | 2.42     | 3.038(3) | 131.5  |
| O(1)-H(1O)...O(1S^a)     | 0.84 | 1.87     | 2.645(4) | 153.0  |
| O(1)-H(1O)...O(1S^a)#1   | 0.84 | 1.97     | 2.797(4) | 167.6  |
| C(1S)-H(1SC^a)...O(2)#5  | 0.98 | 2.59     | 3.527(3) | 160.6  |
| O(1S^a)-(H1S^a)...O(2)#6 | 0.84 | 1.99     | 2.834(4) | 177.0  |

Symmetry transformations used to generate equivalent atoms:

#1  $-x, y, -z$     #2  $x+1/2, y-1/2, z+1$     #3  $-x+3/2, y+1/2, -z+2$

#4  $x, y+1, z$     #5  $-x+1/2, y-1/2, -z+1$     #6  $x-1/2, y-1/2, z-1$
